# Supplementary material for: Bosminopsis deitersi (Crustacea: Cladocera) as an ancient species group: a revision
Source: PeerJ. 2021 Apr 23;9:e11310. doi: 10.7717/peerj.11310 (PMC8074845; doi:10.7717/peerj.11310)
Supplement: Supplemental Information 1 [file peerj-09-11310-s001.xls]

## Sheet: Resources
Both genetics and morphology was studied:
Organism	Specimen_voucher	Country	Isolation source	Lat-Lon	Date	Collector	Identifier	Note	16S GenBank	COI GenBank	18S GenBank	28S GenBank	MGU MI acc. no.
Bosminopsis zernowi	bs001_Russia_Primorsky01a	Russia: Primorski Territory	Lake Livadijskoe, Nakhodka Area	42.864 N 132.655 E	28-Sep-2004	A.Y. Sinev	A.A. Kotov	Sample AAK-M-0062		MT757459	MT757232	MT757314	MGU Ml 211 (10)
Bosminopsis zernowi	bs002_Russia_Primorsky01b	Russia: Primorski Territory	Lake Livadijskoe, Nakhodka Area	42.864 N 132.655 E	28-Sep-2004	A.Y. Sinev	A.A. Kotov	Sample AAK-M-0062			MT757233	MT757315	MGU Ml 211 (10)
Bosminopsis zernowi	bs003_Russia_Primorsky01c	Russia: Primorski Territory	Lake Livadijskoe, Nakhodka Area	42.864 N 132.655 E	28-Sep-2004	A.Y. Sinev	A.A. Kotov	Sample AAK-M-0062			MT757234	MT757316	MGU Ml 211 (10)
Bosminopsis zernowi	bs004_Russia_Primorsky01d	Russia: Primorski Territory	Lake Livadijskoe, Nakhodka Area	42.864 N 132.655 E	28-Sep-2004	A.Y. Sinev	A.A. Kotov	Sample AAK-M-0062			MT757235	MT757317	MGU Ml 211 (10)
Bosminopsis zernowi	bs005_Russia_Tomsk01a	Russia: Tomsk Area	Affluent of River Tom'	56.67278 N 84.69933 E	16-Jul-2005	A.A. Kotov	A.A. Kotov	Sample AAK-M-0126			MT757236	MT757318
Bosminopsis zernowi	bs006_Russia_Tomsk01b	Russia: Tomsk Area	Affluent of River Tom'	56.67278 N 84.69933 E	16-Jul-2005	A.A. Kotov	A.A. Kotov	Sample AAK-M-0126			MT757237	MT757319
Bosminopsis zernowi	bs007_Japan01e	Japan: Mie	Sai-no-Kami Ike, Ise County, Mie	34.4722 N 136.6044 E	6-Oct-2005	S. Ishida	A.A. Kotov	Sample AAK-M-0209			MT757238	MT757320	MGU Ml 212 (11)
Bosminopsis zernowi	bs008_Japan01f	Japan: Mie	Sai-no-Kami Ike, Ise County, Mie	34.4722 N 136.6044 E	6-Oct-2005	S. Ishida	A.A. Kotov	Sample AAK-M-0209			MT757239	MT757321	MGU Ml 212 (11)
Bosminopsis zernowi	bs009_Japan01g	Japan: Mie	Sai-no-Kami Ike, Ise County, Mie	34.4722 N 136.6044 E	6-Oct-2005	S. Ishida	A.A. Kotov	Sample AAK-M-0209			MT757240	MT757322	MGU Ml 212 (11)
Bosminopsis zernowi	bs010_Japan01h	Japan: Mie	Sai-no-Kami Ike, Ise County, Mie	34.4722 N 136.6044 E	6-Oct-2005	S. Ishida	A.A. Kotov	Sample AAK-M-0209			MT757241	MT757323	MGU Ml 212 (11)
Bosminopsis zernowi	bs011_Japan03a	Japan: Toyama	Oh-Zuka Ike	36.65 N 137.1167 E	16-May-2004	S. Ishida, S. Tanaka	A.A. Kotov	Sample AAK-M-0447			MT757242	MT757324	MGU Ml 213 (4)
Bosminopsis zernowi	bs012_Japan03b	Japan: Toyama	Oh-Zuka Ike	36.65 N 137.1167 E	16-May-2004	S. Ishida, S. Tanaka	A.A. Kotov	Sample AAK-M-0447	MT757174		MT757243	MT757325	MGU Ml 213 (4)
Bosminopsis zernowi	bs013_Japan03c	Japan: Toyama	Oh-Zuka Ike	36.65 N 137.1167 E	16-May-2004	S. Ishida, S. Tanaka	A.A. Kotov	Sample AAK-M-0447			MT757244	MT757326	MGU Ml 213 (4)
Bosminopsis zernowi	bs014_Japan03d	Japan: Toyama	Oh-Zuka Ike	36.65 N 137.1167 E	16-May-2004	S. Ishida, S. Tanaka	A.A. Kotov	Sample AAK-M-0447			MT757245	MT757327	MGU Ml 213 (4)
Bosminopsis zernowi	bs015_Japan03e	Japan: Toyama	Oh-Zuka Ike	36.65 N 137.1167 E	16-May-2004	S. Ishida, S. Tanaka	A.A. Kotov	Sample AAK-M-0448	MT757175	MT757460		MT757328	MGU Ml 214 (2)
Bosminopsis zernowi	bs016_Japan03f	Japan: Toyama	Oh-Zuka Ike	36.65 N 137.1167 E	16-May-2004	S. Ishida, S. Tanaka	A.A. Kotov	Sample AAK-M-0448		MT757461		MT757329	MGU Ml 214 (2)
Bosminopsis zernowi	bs017_Japan04a	Japan: Hokkaido Island	Moere-Numa	43.1204 N 141.4294 E	7-Oct-2006	S. Ishida	A.A. Kotov	Sample AAK-M-0511		MT757462	MT757246	MT757330
Bosminopsis zernowi	bs018_Japan04b	Japan: Hokkaido Island	Moere-Numa	43.1204 N 141.4294 E	7-Oct-2006	S. Ishida	A.A. Kotov	Sample AAK-M-0511			MT757247	MT757331
Bosminopsis zernowi	bs019_Russia_Sakhalin01a	Russia: Sakhalin Area	Russkoe Lake, Puzina Peninsula	46.78278 N 143.3397 E	9-Sep-2008	A.A. Kotov & N.M. Korovchinsky	A.A. Kotov	Sample AAK-M-0821	MT757176		MT757248		MGU Ml 215 (9)
Bosminopsis zernowi	bs020_Russia_Sakhalin01b	Russia: Sakhalin Area	Russkoe Lake, Puzina Peninsula	46.78278 N 143.3397 E	9-Sep-2008	A.A. Kotov & N.M. Korovchinsky	A.A. Kotov	Sample AAK-M-0821	MT757177	MT757463		MT757332	MGU Ml 215 (9)
Bosminopsis zernowi	bs021_Russia_Sakhalin01c	Russia: Sakhalin Area	Russkoe Lake, Puzina Peninsula	46.78278 N 143.3397 E	9-Sep-2008	A.A. Kotov & N.M. Korovchinsky	A.A. Kotov	Sample AAK-M-0821			MT757249		MGU Ml 215 (9)
Bosminopsis zernowi	bs022_Russia_Sakhalin01d	Russia: Sakhalin Area	Russkoe Lake, Puzina Peninsula	46.78278 N 143.3397 E	9-Sep-2008	A.A. Kotov & N.M. Korovchinsky	A.A. Kotov	Sample AAK-M-0821			MT757250	MT757333	MGU Ml 215 (9)
Bosminopsis zernowi	bs023_China02a	China: Guangdong	Jiu Long Lake, Guangzhou	23.47 N 113.41 E			A.A. Kotov	Sample AAK-M-1111			MT757251	MT757334	MGU Ml 216 (1)
Bosminopsis zernowi	bs024_China02b	China: Guangdong	Jiu Long Lake, Guangzhou	23.47 N 113.41 E			A.A. Kotov	Sample AAK-M-1111				MT757335	MGU Ml 216 (1)
Bosminopsis zernowi	bs025_Japan02a	Japan: Shiga	Sho-Jyo Ko	35.4456 N 135.9836 E	28-Jul-2005	S. Ishida	A.A. Kotov	Sample AAK-M-1134	MT757178	MT757464	MT757252	MT757336	MGU Ml 217 (18)
Bosminopsis zernowi	bs026_Japan02b	Japan: Shiga	Sho-Jyo Ko	35.4456 N 135.9836 E	28-Jul-2005	S. Ishida	A.A. Kotov	Sample AAK-M-1134			MT757253	MT757337	MGU Ml 217 (18)
Bosminopsis zernowi	bs027_Japan02c	Japan: Shiga	Sho-Jyo Ko	35.4456 N 135.9836 E	28-Jul-2005	S. Ishida	A.A. Kotov	Sample AAK-M-1134	MT757179		MT757254	MT757338	MGU Ml 217 (18)
Bosminopsis zernowi	bs028_Japan02d	Japan: Shiga	Sho-Jyo Ko	35.4456 N 135.9836 E	28-Jul-2005	S. Ishida	A.A. Kotov	Sample AAK-M-1134	MT757180	MT757465	MT757255	MT757339	MGU Ml 217 (18)
Bosminopsis zernowi	bs029_Japan01a	Japan: Mie	Sai-no-Kami Ike, Ise County, Mie	34.4722 N 136.6044 E	6-Oct-2005	S. Ishida	A.A. Kotov	Sample AAK-M-1138			MT757256	MT757340	MGU Ml 218 (18)
Bosminopsis zernowi	bs030_Japan01b	Japan: Mie	Sai-no-Kami Ike, Ise County, Mie	34.4722 N 136.6044 E	6-Oct-2005	S. Ishida	A.A. Kotov	Sample AAK-M-1138	MT757181			MT757341	MGU Ml 218 (18)
Bosminopsis zernowi	bs031_Japan01c	Japan: Mie	Sai-no-Kami Ike, Ise County, Mie	34.4722 N 136.6044 E	6-Oct-2005	S. Ishida	A.A. Kotov	Sample AAK-M-1138	MT757182		MT757257	MT757342	MGU Ml 218 (18)
Bosminopsis zernowi	bs032_Japan01d	Japan: Mie	Sai-no-Kami Ike, Ise County, Mie	34.4722 N 136.6044 E	6-Oct-2005	S. Ishida	A.A. Kotov	Sample AAK-M-1138	MT757183		MT757258	MT757343	MGU Ml 218 (18)
Bosminopsis zernowi	bs033_Russia_Primorsky05a	Russia: Primorski Territory	Ilyinskoe Lake 1 (near the road),region of Khanka Lake	44.92113 N 131.9642 E	10-Sep-2009	N.M. Korovchinsky	A.A. Kotov	Sample AAK-M-1263	MT757184		MT757259	MT757344	MGU Ml 219 (10)
Bosminopsis zernowi	bs034_Russia_Primorsky05b	Russia: Primorski Territory	Ilyinskoe Lake 1 (near the road),region of Khanka Lake	44.92113 N 131.9642 E	10-Sep-2009	N.M. Korovchinsky	A.A. Kotov	Sample AAK-M-1263			MT757260	MT757345	MGU Ml 219 (10)
Bosminopsis zernowi	bs035_Russia_Primorsky05c	Russia: Primorski Territory	Ilyinskoe Lake 1 (near the road),region of Khanka Lake	44.92113 N 131.9642 E	10-Sep-2009	N.M. Korovchinsky	A.A. Kotov	Sample AAK-M-1263	MT757185		MT757261	MT757346	MGU Ml 219 (10)
Bosminopsis zernowi	bs036_Russia_Primorsky05d	Russia: Primorski Territory	Ilyinskoe Lake 1 (near the road),region of Khanka Lake	44.92113 N 131.9642 E	10-Sep-2009	N.M. Korovchinsky	A.A. Kotov	Sample AAK-M-1263	MT757186		MT757262	MT757347	MGU Ml 219 (10)
Bosminopsis zernowi	bs037_Russia_Primorsky06a	Russia: Primorski Territory	Ilyinskoe Lake 2, region of Lake Khanka	44.9287 N 131.9482 E	10-Sep-2009	N.M. Korovchinsky	A.A. Kotov	Sample AAK-M-1266			MT757263	MT757348	MGU Ml 220 (11)
Bosminopsis zernowi	bs038_Russia_Primorsky06b	Russia: Primorski Territory	Ilyinskoe Lake 2, region of Lake Khanka	44.9287 N 131.9482 E	10-Sep-2009	N.M. Korovchinsky	A.A. Kotov	Sample AAK-M-1266				MT757349	MGU Ml 220 (11)
Bosminopsis zernowi	bs039_Russia_Primorsky06c	Russia: Primorski Territory	Ilyinskoe Lake 2, region of Lake Khanka	44.9287 N 131.9482 E	10-Sep-2009	N.M. Korovchinsky	A.A. Kotov	Sample AAK-M-1266	MT757187		MT757264	MT757350	MGU Ml 220 (11)
Bosminopsis zernowi	bs040_Russia_Primorsky06d	Russia: Primorski Territory	Ilyinskoe Lake 2, region of Lake Khanka	44.9287 N 131.9482 E	10-Sep-2009	N.M. Korovchinsky	A.A. Kotov	Sample AAK-M-1266	MT757188		MT757265	MT757351	MGU Ml 220 (11)
Bosminopsis zernowi	bs041_SKorea04a	South Korea: Gyeongsangnam-do	Hap Cheon 1 (Reservoir)	35.60305 N 128.0322 E	6-Oct-2009	H.G. Jeong	A.A. Kotov	Sample AAK-M-1871				MT757352	MGU Ml 222 (10)
Bosminopsis zernowi	bs042_SKorea04b	South Korea: Gyeongsangnam-do	Hap Cheon 1 (Reservoir)	35.60305 N 128.0322 E	6-Oct-2009	H.G. Jeong	A.A. Kotov	Sample AAK-M-1871		MT757466		MT757353	MGU Ml 222 (10)
Bosminopsis zernowi	bs043_SKorea04c	South Korea: Gyeongsangnam-do	Hap Cheon 1 (Reservoir)	35.60305 N 128.0322 E	6-Oct-2009	H.G. Jeong	A.A. Kotov	Sample AAK-M-1871				MT757354	MGU Ml 222 (10)
Bosminopsis zernowi	bs044_SKorea04d	South Korea: Gyeongsangnam-do	Hap Cheon 1 (Reservoir)	35.60305 N 128.0322 E	6-Oct-2009	H.G. Jeong	A.A. Kotov	Sample AAK-M-1871				MT757355	MGU Ml 222 (10)
Bosminopsis zernowi	bs045_Russia_Yakutia01a	Russia: Yakutia Republic	Affluent 2 near Kurja Strelka, Yakutsk	62.02113 N 129.7564 E	3-Sep-2010	A.A. Kotov	A.A. Kotov	Sample AAK-M-2002		MT757467	MT757266	MT757356	MGU Ml 224 (5)
Bosminopsis zernowi	bs046_Russia_Yakutia01b	Russia: Yakutia Republic	Affluent 2 near Kurja Strelka, Yakutsk	62.02113 N 129.7564 E	3-Sep-2010	A.A. Kotov	A.A. Kotov	Sample AAK-M-2002			MT757267	MT757357	MGU Ml 224 (5)
Bosminopsis zernowi	bs047_Russia_Primorsky04a	Russia: Primorski Territory	Quarry near Borisovsky Most	43.49751 N 131.5008 E	Sep-2009	N.M. Korovchinsky	A.A. Kotov	Sample AAK-M-2067			MT757268	MT757358	MGU Ml 225 (10)
Bosminopsis zernowi	bs048_Russia_Primorsky04b	Russia: Primorski Territory	Quarry near Borisovsky Most	43.49751 N 131.5008 E	Sep-2010	N.M. Korovchinsky	A.A. Kotov	Sample AAK-M-2067				MT757359	MGU Ml 225 (10)
Bosminopsis zernowi	bs049_Russia_Primorsky04c	Russia: Primorski Territory	Quarry near Borisovsky Most	43.49751 N 131.5008 E	Sep-2010	N.M. Korovchinsky	A.A. Kotov	Sample AAK-M-2067				MT757360	MGU Ml 225 (10)
Bosminopsis zernowi	bs050_Russia_Primorsky04d	Russia: Primorski Territory	Quarry near Borisovsky Most	43.49751 N 131.5008 E	Sep-2010	N.M. Korovchinsky	A.A. Kotov	Sample AAK-M-2067			MT757269	MT757361	MGU Ml 225 (10)
Bosminopsis zernowi	bs051_Vietnam01a	Vietnam: Thua Thien Hue	Huang River, Hue	16.47186 N 107.595 E	26-May-2012	H.G. Jeong, H.J. Dumont	A.A. Kotov	Sample AAK-M-2543				MT757362	MGU Ml 227 (10)
Bosminopsis zernowi	bs052_Vietnam01b	Vietnam: Thua Thien Hue	Huang River, Hue	16.47186 N 107.595 E	26-May-2012	H.G. Jeong, H.J. Dumont	A.A. Kotov	Sample AAK-M-2543				MT757363	MGU Ml 227 (10)
Bosminopsis zernowi	bs053_Vietnam01c	Vietnam: Thua Thien Hue	Huang River, Hue	16.47186 N 107.595 E	26-May-2012	H.G. Jeong, H.J. Dumont	A.A. Kotov	Sample AAK-M-2543				MT757364	MGU Ml 227 (10)
Bosminopsis zernowi	bs054_Vietnam01d	Vietnam: Thua Thien Hue	Huang River, Hue	16.47186 N 107.595 E	26-May-2012	H.G. Jeong, H.J. Dumont	A.A. Kotov	Sample AAK-M-2543				MT757365	MGU Ml 227 (10)
Bosminopsis zernowi	bs055_SKorea03a	South Korea: Jeollanam-do	Jaeun reservoir	35.12008 N 127.4412 E	30-Oct-2013	H.G. Jeong	A.A. Kotov	Sample AAK-M-3329				MT757366	MGU Ml 228 (1)
Bosminopsis zernowi	bs056_SKorea03b	South Korea: Jeollanam-do	Jaeun reservoir	35.12008 N 127.4412 E	30-Oct-2013	H.G. Jeong	A.A. Kotov	Sample AAK-M-3329				MT757367	MGU Ml 228 (1)
Bosminopsis zernowi	bs057_China01a	China: Guangdong	DingHu lake (open water)	23.17 N 112.56 E	11-May-2012	A.A. Kotov, H.J. Dumont, B.P. Han et al.	A.A. Kotov	Sample AAK-M-3368				MT757368
Bosminopsis zernowi	bs058_China01b	China: Guangdong	DingHu lake (open water)	23.17 N 112.56 E	11-May-2012	A.A. Kotov, H.J. Dumont, B.P. Han et al.	A.A. Kotov	Sample AAK-M-3368		MT757468		MT757369
Bosminopsis zernowi	bs059_Russia_Khabarovsk01a	Russia: Khabarovsk Territory	River Simmy near Kordon Vakhtar, Lake Bolon basin	49.41304 N 135.8447 E	18-Aug-2016	E.S. Certoprud	A.A. Kotov	Sample AAK-M-3904				MT757370
Bosminopsis zernowi	bs060_Russia_Khabarovsk01b	Russia: Khabarovsk Territory	River Simmy near Kordon Vakhtar, Lake Bolon basin	49.41304 N 135.8447 E	18-Aug-2016	E.S. Certoprud	A.A. Kotov	Sample AAK-M-3904				MT757371
Bosminopsis zernowi	bs061_SKorea06a	South Korea: Gangwon-do	Chilseong reservoir	37.72984 N 128.8985 E	13-Jul-2017	A.A. Kotov, Kyu Suk Chae, Sunjung Ji, Hyensoo Kim	A.A. Kotov	Sample AAK-M-3945				MT757372
Bosminopsis zernowi	bs062_SKorea06b	South Korea: Gangwon-do	Chilseong reservoir	37.72984 N 128.8985 E	13-Jul-2017	A.A. Kotov, Kyu Suk Chae, Sunjung Ji, Hyensoo Kim	A.A. Kotov	Sample AAK-M-3945		MT757469		MT757373
Bosminopsis zernowi	bs063_SKorea05a	South Korea: Gyeongsangbuk-do	Hagok reservoir (a large, shallow lake, no littoral zone)	35.98441 N 129.153 E	14-Jul-2017	A.A. Kotov & Kyu Suk Chae	A.A. Kotov	Sample AAK-M-3966		MT757470	MT757270		MGU Ml 229 (10)
Bosminopsis zernowi	bs064_SKorea05b	South Korea: Gyeongsangbuk-do	Hagok reservoir (a large, shallow lake, no littoral zone)	35.98441 N 129.153 E	14-Jul-2017	A.A. Kotov & Kyu Suk Chae	A.A. Kotov	Sample AAK-M-3966			MT757271	MT757374	MGU Ml 229 (10)
Bosminopsis zernowi	bs065_SKorea05c	South Korea: Gyeongsangbuk-do	Hagok reservoir (a large, shallow lake, no littoral zone)	35.98441 N 129.153 E	14-Jul-2017	A.A. Kotov & Kyu Suk Chae	A.A. Kotov	Sample AAK-M-3966	MT757189	MT757471		MT757375	MGU Ml 229 (10)
Bosminopsis zernowi	bs066_SKorea05d	South Korea: Gyeongsangbuk-do	Hagok reservoir (a large, shallow lake, no littoral zone)	35.98441 N 129.153 E	14-Jul-2017	A.A. Kotov & Kyu Suk Chae	A.A. Kotov	Sample AAK-M-3966				MT757376	MGU Ml 229 (10)
Bosminopsis zernowi	bs067_SKorea05e	South Korea: Gyeongsangbuk-do	Hagok reservoir (a large, shallow lake, no littoral zone)	35.98441 N 129.153 E	14-Jul-2017	A.A. Kotov & Kyu Suk Chae	A.A. Kotov	Sample AAK-M-3967		MT757472	MT757272	MT757377	MGU Ml 230 (10)
Bosminopsis zernowi	bs068_SKorea05f	South Korea: Gyeongsangbuk-do	Hagok reservoir (a large, shallow lake, no littoral zone)	35.98441 N 129.153 E	14-Jul-2017	A.A. Kotov & Kyu Suk Chae	A.A. Kotov	Sample AAK-M-3967			MT757273	MT757378	MGU Ml 230 (10)
Bosminopsis zernowi	bs069_SKorea05g	South Korea: Gyeongsangbuk-do	Hagok reservoir (a large, shallow lake, no littoral zone)	35.98441 N 129.153 E	14-Jul-2017	A.A. Kotov & Kyu Suk Chae	A.A. Kotov	Sample AAK-M-3967		MT757473		MT757379	MGU Ml 230 (10)
Bosminopsis zernowi	bs070_SKorea05h	South Korea: Gyeongsangbuk-do	Hagok reservoir (a large, shallow lake, no littoral zone)	35.98441 N 129.153 E	14-Jul-2017	A.A. Kotov & Kyu Suk Chae	A.A. Kotov	Sample AAK-M-3967					MGU Ml 230 (10)
Bosminopsis zernowi	bs071_SKorea01a	South Korea: Jeollanam-do	Useul reservoir	34.5706 N 126.6133 E	17-Jul-2017	A.A. Kotov & Kyu Suk Chae	A.A. Kotov	Sample AAK-M-4007				MT757380	MGU Ml 231 (10)
Bosminopsis zernowi	bs072_SKorea01b	South Korea: Jeollanam-do	Useul reservoir	34.5706 N 126.6133 E	17-Jul-2017	A.A. Kotov & Kyu Suk Chae	A.A. Kotov	Sample AAK-M-4007				MT757381	MGU Ml 231 (10)
Bosminopsis zernowi	bs073_SKorea01c	South Korea: Jeollanam-do	Useul reservoir	34.5706 N 126.6133 E	17-Jul-2017	A.A. Kotov & Kyu Suk Chae	A.A. Kotov	Sample AAK-M-4007				MT757382	MGU Ml 231 (10)
Bosminopsis zernowi	bs076_SKorea02a	South Korea: Jeollanam-do	A pond near Yanghwa Town Hall	34.74741 N 126.308 E	17-Jul-2017	A.A. Kotov & Kyu Suk Chae	A.A. Kotov	Sample AAK-M-4009				MT757383	MGU Ml 232 (10)
Bosminopsis zernowi	bs077_SKorea02b	South Korea: Jeollanam-do	A pond near Yanghwa Town Hall	34.74741 N 126.308 E	17-Jul-2017	A.A. Kotov & Kyu Suk Chae	A.A. Kotov	Sample AAK-M-4009				MT757384	MGU Ml 232 (10)
Bosminopsis zernowi	bs078_SKorea02c	South Korea: Jeollanam-do	A pond near Yanghwa Town Hall	34.74741 N 126.308 E	17-Jul-2017	A.A. Kotov & Kyu Suk Chae	A.A. Kotov	Sample AAK-M-4009				MT757385	MGU Ml 232 (10)
Bosminopsis zernowi	bs081_Russia_NNovgorov01a	Russia: Nizhni Novgorod Area	Serezha River	55.65659 N 43.6067 E	27-Jul-2018	D. Gavrilko	A.A. Kotov	Sample AAK-M-4227	MT757190			MT757386	MGU Ml 233 (2)
Bosminopsis zernowi	bs082_Russia_NNovgorov01b	Russia: Nizhni Novgorod Area	Serezha River	55.65659 N 43.6067 E	27-Jul-2018	D. Gavrilko	A.A. Kotov	Sample AAK-M-4227	MT757191		MT757274	MT757387	MGU Ml 233 (2)
Bosminopsis zernowi	bs083_Russia_Tomsk01c	Russia: Tomsk Area	The Ob' near village of Mogochino (taken from a ferry)	57.699 N 83.5464 E	13-Jul-2005	A.A. Kotov	A.A. Kotov	Sample AAK-M-0113	MT757192
Bosminopsis zernowi	bs084_Russia_Tomsk01d	Russia: Tomsk Area	The Ob' near village of Mogochino (taken from a ferry)	57.699 N 83.5464 E	13-Jul-2005	A.A. Kotov	A.A. Kotov	Sample AAK-M-0113	MT757193
Bosminopsis zernowi	bs085_Russia_Primorsky05e	Russia: Primorski Territory	Ilyinskoe Lake 1 (near the road),region of Khanka Lake	44.92113 N 131.9642 E	10-Sep-2009	N.M. Korovchinsky	A.A. Kotov	Sample AAK-M-1263	MT757194				MGU Ml 219 (10)
Bosminopsis zernowi	bs086_Russia_Primorsky05f	Russia: Primorski Territory	Ilyinskoe Lake 1 (near the road),region of Khanka Lake	44.92113 N 131.9642 E	10-Sep-2009	N.M. Korovchinsky	A.A. Kotov	Sample AAK-M-1263	MT757195				MGU Ml 219 (10)
Bosminopsis zernowi	bs087_Russia_Primorsky05g	Russia: Primorski Territory	Ilyinskoe Lake 1 (near the road),region of Khanka Lake	44.92113 N 131.9642 E	10-Sep-2009	N.M. Korovchinsky	A.A. Kotov	Sample AAK-M-1263	MT757196				MGU Ml 219 (10)
Bosminopsis zernowi	bs088_Russia_Primorsky05h	Russia: Primorski Territory	Ilyinskoe Lake 1 (near the road),region of Khanka Lake	44.92113 N 131.9642 E	10-Sep-2009	N.M. Korovchinsky	A.A. Kotov	Sample AAK-M-1263	MT757197				MGU Ml 219 (10)
Bosminopsis zernowi	bs089_Russia_Primorsky06e	Russia: Primorski Territory	Ilyinskoe Lake 2, region of Lake Khanka	44.9287 N 131.9482 E	10-Sep-2009	N.M. Korovchinsky	A.A. Kotov	Sample AAK-M-1266	MT757198				MGU Ml 220 (11)
Bosminopsis zernowi	bs090_Russia_Primorsky06f	Russia: Primorski Territory	Ilyinskoe Lake 2, region of Lake Khanka	44.9287 N 131.9482 E	10-Sep-2009	N.M. Korovchinsky	A.A. Kotov	Sample AAK-M-1266	MT757199				MGU Ml 220 (11)
Bosminopsis zernowi	bs091_Russia_Primorsky06g	Russia: Primorski Territory	Ilyinskoe Lake 2, region of Lake Khanka	44.9287 N 131.9482 E	10-Sep-2009	N.M. Korovchinsky	A.A. Kotov	Sample AAK-M-1266	MT757200				MGU Ml 220 (11)
Bosminopsis deitersi	bs092_Argentina01a	Argentina: Corrientes	Deep part of lake near bridge	28.54272 S 57.19245 W	21-Feb-2006	A. Anderson, L. Hovind, W. H. Piel	A.A. Kotov	Sample AAK-M-0244	MT757201
Bosminopsis deitersi	bs093_Argentina01b	Argentina: Corrientes	Deep part of lake near bridge	28.54272 S 57.19245 W	21-Feb-2006	A. Anderson, L. Hovind, W. H. Piel	A.A. Kotov	Sample AAK-M-0244	MT757202
Bosminopsis deitersi	bs094_USA01a	U.S.A.: Arkansas	Lake Jack Lee	33 N 92 W		D.J. Taylor	A.A. Kotov	Sample DJT	MT757203			MT757388
Bosminopsis zernowi	bs095_Russia_Khakass01a	Russia: Khakass Republic	Oxbow 2, Abakan River	53.55886 N 91.30116 E	25-Aug-2010	D.E. Shcherbakov	A.A. Kotov	Sample AAK-M-1646	MT757204
Bosminopsis zernowi	bs096_Russia_Khakass01b	Russia: Khakass Republic	Oxbow 2, Abakan River	53.55886 N 91.30116 E	25-Aug-2010	D.E. Shcherbakov	A.A. Kotov	Sample AAK-M-1646	MT757205
Bosminopsis zernowi	bs097_Russia_Khakass01c	Russia: Khakass Republic	Oxbow 2, Abakan River	53.55886 N 91.30116 E	25-Aug-2010	D.E. Shcherbakov	A.A. Kotov	Sample AAK-M-1646	MT757206
Bosminopsis cf. deitersi	bs098_Thailand01a	Thailand: Kalasin Province	Bung Pueng	16.29383 N 103.6127 E	4-Dec-2010	N.M. Korovchinsky	A.A. Kotov	Sample AAK-M-1857	MT757207				MGU Ml 221 (12)
Bosminopsis cf. deitersi	bs099_Thailand01b	Thailand: Kalasin Province	Bung Pueng	16.29383 N 103.6127 E	4-Dec-2010	N.M. Korovchinsky	A.A. Kotov	Sample AAK-M-1857	MT757208				MGU Ml 221 (12)
Bosminopsis cf. deitersi	bs100_Thailand01c	Thailand: Kalasin Province	Bung Pueng	16.29383 N 103.6127 E	4-Dec-2010	N.M. Korovchinsky	A.A. Kotov	Sample AAK-M-1857	MT757209				MGU Ml 221 (12)
Bosminopsis cf. deitersi	bs101_Thailand01d	Thailand: Kalasin Province	Bung Pueng	16.29383 N 103.6127 E	4-Dec-2010	N.M. Korovchinsky	A.A. Kotov	Sample AAK-M-1857	MT757210				MGU Ml 221 (12)
Bosminopsis cf. deitersi	bs102_Thailand01e	Thailand: Kalasin Province	Bung Pueng	16.29383 N 103.6127 E	4-Dec-2010	N.M. Korovchinsky	A.A. Kotov	Sample AAK-M-1857	MT757211				MGU Ml 221 (12)
Bosminopsis cf. deitersi	bs103_Thailand01f	Thailand: Kalasin Province	Bung Pueng	16.29383 N 103.6127 E	4-Dec-2010	N.M. Korovchinsky	A.A. Kotov	Sample AAK-M-1857	MT757212				MGU Ml 221 (12)
Bosminopsis cf. deitersi	bs104_Thailand01g	Thailand: Kalasin Province	Bung Pueng	16.29383 N 103.6127 E	4-Dec-2010	N.M. Korovchinsky	A.A. Kotov	Sample AAK-M-1857	MT757213				MGU Ml 221 (12)
Bosminopsis cf. deitersi	bs105_Thailand01h	Thailand: Kalasin Province	Bung Pueng	16.29383 N 103.6127 E	4-Dec-2010	N.M. Korovchinsky	A.A. Kotov	Sample AAK-M-1857	MT757214				MGU Ml 221 (12)
Bosminopsis cf. deitersi	bs106_Thailand01i	Thailand: Kalasin Province	Bung Pueng	16.29383 N 103.6127 E	4-Dec-2010	N.M. Korovchinsky	A.A. Kotov	Sample AAK-M-1857	MT757215				MGU Ml 221 (12)
Bosminopsis zernowi	bs107_Russia_Yakutia02a	Russia: Yakutia Republic	Kuria Strelka, town of Yakutsk	62.02006 N 129.7602 E	3-Sep-2010	A.A. Kotov	A.A. Kotov	Sample AAK-M-1998	MT757216				MGU Ml 223 (2)
Bosminopsis zernowi	bs108_Russia_Yakutia02b	Russia: Yakutia Republic	Kuria Strelka, town of Yakutsk	62.02006 N 129.7602 E	3-Sep-2010	A.A. Kotov	A.A. Kotov	Sample AAK-M-1998	MT757217				MGU Ml 223 (2)
Bosminopsis zernowi	bs109_Russia_Yakutia02c	Russia: Yakutia Republic	Kuria Strelka, town of Yakutsk	62.02006 N 129.7602 E	3-Sep-2010	A.A. Kotov	A.A. Kotov	Sample AAK-M-1998	MT757218				MGU Ml 223 (2)
Bosminopsis zernowi	bs110_Russia_Yakutia02d	Russia: Yakutia Republic	Kuria Strelka, town of Yakutsk	62.02006 N 129.7602 E	3-Sep-2010	A.A. Kotov	A.A. Kotov	Sample AAK-M-1998	MT757219				MGU Ml 223 (2)
Bosminopsis zernowi	bs111_Russia_Yakutia01c	Russia: Yakutia Republic	Affluent 2 near Kurja Strelka, Yakutsk	62.02113 N 129.7564 E	3-Sep-2010	A.A. Kotov	A.A. Kotov	Sample AAK-M-2002	MT757220				MGU Ml 224 (5)
Bosminopsis zernowi	bs112_Russia_Yakutia01d	Russia: Yakutia Republic	Affluent 2 near Kurja Strelka, Yakutsk	62.02113 N 129.7564 E	3-Sep-2010	A.A. Kotov	A.A. Kotov	Sample AAK-M-2002	MT757221				MGU Ml 224 (5)
Bosminopsis zernowi	bs113_Russia_Yakutia01e	Russia: Yakutia Republic	Affluent 2 near Kurja Strelka, Yakutsk	62.02113 N 129.7564 E	3-Sep-2010	A.A. Kotov	A.A. Kotov	Sample AAK-M-2002	MT757222				MGU Ml 224 (5)
Bosminopsis zernowi	bs114_Russia_Yakutia01f	Russia: Yakutia Republic	Affluent 2 near Kurja Strelka, Yakutsk	62.02113 N 129.7564 E	3-Sep-2010	A.A. Kotov	A.A. Kotov	Sample AAK-M-2002	MT757223				MGU Ml 224 (5)
Bosminopsis zernowi	bs115_Russia_Primorsky03a	Russia: Primorski Territory	Quarry near Borisovsky Most	43.49751 N 131.5008 E	Sep-2010	N.M. Korovchinsky	A.A. Kotov	Sample AAK-M-2067	MT757224				MGU Ml 225 (10)
Bosminopsis zernowi	bs116_Russia_Primorsky03b	Russia: Primorski Territory	Quarry near Borisovsky Most	43.49751 N 131.5008 E	Sep-2010	N.M. Korovchinsky	A.A. Kotov	Sample AAK-M-2067	MT757225				MGU Ml 225 (10)
Bosminopsis zernowi	bs117_Russia_Primorsky03c	Russia: Primorski Territory	Quarry near Borisovsky Most	43.49751 N 131.5008 E	Sep-2010	N.M. Korovchinsky	A.A. Kotov	Sample AAK-M-2067	MT757226				MGU Ml 225 (10)
Bosminopsis zernowi	bs118_Russia_Primorsky03d	Russia: Primorski Territory	Quarry near Borisovsky Most	43.49751 N 131.5008 E	Sep-2010	N.M. Korovchinsky	A.A. Kotov	Sample AAK-M-2067	MT757227				MGU Ml 225 (10)
Bosminopsis zernowi	bs119_Russia_Primorsky03e	Russia: Primorski Territory	Quarry near Borisovsky Most	43.49751 N 131.5008 E	Sep-2010	N.M. Korovchinsky	A.A. Kotov	Sample AAK-M-2067	MT757228				MGU Ml 225 (10)
Bosminopsis zernowi	bs120_Russia_Primorsky03f	Russia: Primorski Territory	Quarry near Borisovsky Most	43.49751 N 131.5008 E	Sep-2010	N.M. Korovchinsky	A.A. Kotov	Sample AAK-M-2067	MT757229				MGU Ml 225 (10)
Bosminopsis zernowi	bs121_Russia_Primorsky02a	Russia: Primorski Territory	Roadside pond	43.41 N 131.82 E	Sep-2010	N.M. Korovchinsky	A.A. Kotov	Sample AAK-M-2077	MT757230				MGU Ml 226 (1)
Bosminopsis zernowi	bs122_Russia_Primorsky02b	Russia: Primorski Territory	Roadside pond	43.41 N 131.82 E	Sep-2010	N.M. Korovchinsky	A.A. Kotov	Sample AAK-M-2077	MT757231				MGU Ml 226 (1)
Bosmina	Outgroup	Eurasia						GenBank	AF484001	KU720118	AM490275	EU370437
Cyclestheria	Outgroup	Australia						GenBank	EF189603	JX999894
Cyclestheria	Outgroup	South America						GenBank		JX999896	AF144209
Cyclestheria	Outgroup	Asia						GenBank		JX999912		JX999853
Daphnia	Outgroup	Eurasia						GenBank	MF346511	KX442698	KY694378	AF532883
Simocephalus	Outgroup	Eurasia						GenBank	LC387808	EU702298	LC387809	EF189661
Triops	Outgroup	Eurasia						GenBank	EF190480	DQ369317	EU370422	LT598810
Morphology only was studied:
Bosminopsis deitersi		Brazil: Amazonas	Lago do Castanho		1974-06-25	G.-O. Brandorff	A.A. Kotov
Bosminopsis deitersi		Ukraine: Poltava Area	a tributary of Dnepr River near Kremenchug		1927-07-28	L. Rodina
Bosminopsis zernowi		Brazil: Pará	Rio Tapajóz, b. Fordlandia, Zool.-Oberfl.		1948-01-14	V. Koste
